# Supplementary material for: Simplifying silver isotope analysis of metallic samples: using silver nitrate precipitation to avoid perilous chloride formation
Source: Royal Society of Chemistry journal article supplement (doi:10.1039/d3ja00374d), 2024-01-01
Supplement: d3ja00374d1.xlsx [file d3ja00374d1.xlsx]

## Sheet: Supplementary Table
Sample ID	Date	105Pd (V)	106Pd (V)	107Ag (V)	108Pd (V)	109Ag (V)	111Cd (V)	107Ag/109Ag	108Pd/105Pd	106Pd/105Pd	111Cd/105Pd	107Ag/105Pd	111Cd/107Ag	109Ag/107Ag		β106Pd/105Pd	109Ag/107Ag	β108Pd/105Pd	109Ag/107Ag		Ɛ109Ag/107Ag	2SE	2SE (prop)	Ɛ109Ag/107Ag	2SE	2SE (prop)
								Raw	Raw	Raw	Raw	Raw	Raw	Raw		(Cd IC)	(IC- MB-106Pd)	(Cd IC)	(IC- MB-108Pd)		(β106Pd/105Pd)			(β108Pd/105Pd)
Silver Coin
SC004-B-3	2019-06-20	1.82844	2.27423	4.67567	2.28667	4.47453	3.44237e-06	1.04495	1.25061	1.24381	4.90378e-06	2.55719	1.91727e-06	0.95698		-1.70205	0.927231	-1.91343	0.923625		0.914199	0.385175	0.593026	0.33607	0.170033	0.251521
SC004-A-2	2019-06-20	1.78855	2.2246	4.54512	2.23675	4.34957	3.82846e-06	1.04496	1.2506	1.2438	4.97011e-06	2.54123	1.95573e-06	0.956974		-1.70174	0.927228	-1.91299	0.923631		1.12351	0.366337	0.56788	0.602027	0.203705	0.293263
SC004-B-1	2019-06-20	1.82307	2.26772	4.66599	2.28041	4.46597	3.56161e-06	1.04479	1.25086	1.2439	4.98391e-06	2.55942	1.9477e-06	0.957133		-1.70982	0.927245	-1.9205	0.923654		0.956584	0.383932	0.587064	0.659253	0.189208	0.290711
SC004-B-2	2019-06-20	1.82926	2.27534	4.67956	2.2879	4.47856	3.01523e-06	1.04488	1.25073	1.24386	4.67244e-06	2.55817	1.82663e-06	0.957047		-1.70632	0.927221	-1.91664	0.92364		0.651868	0.369303	0.55103	0.505104	0.161601	0.262156
SCA004-A-1	2019-06-20	1.81227	2.25404	4.60491	2.2662	4.40659	6.61661e-06	1.045	1.25048	1.24377	6.15905e-06	2.54096	2.42395e-06	0.956934		-1.69893	0.927236	-1.90966	0.923648		1.14316	0.397479	0.617155	0.6991	0.195816	0.285159
Average																								0.560311	0.290041
Silver Wire
SW001-1	2019-07-18	1.42977	1.78065	3.52798	1.79439	3.38365	-7.46204e-06	1.04265	1.25502	1.24541	3.51758e-06	2.46752	1.42554e-06	0.959091		-1.83832	0.926959	-2.03818	0.923519		0.475616	0.39257	0.675933	-0.294977	0.214524	0.313714
SW001-2	2019-07-18	1.42802	1.77847	3.52384	1.79222	3.37967	-4.22887e-06	1.04266	1.25504	1.2454	4.78442e-06	2.46763	1.93892e-06	0.959088		-1.83747	0.926967	-2.03869	0.923511		0.335971	0.408063	0.650357	-0.353235	0.20225	0.285697
SW001-3	2019-07-18	1.42985	1.78075	3.52609	1.79451	3.38181	-5.4084e-06	1.04266	1.25504	1.24542	3.31352e-06	2.46606	1.34362e-06	0.959082		-1.83856	0.926938	-2.03872	0.923502		-0.239811	0.307912	0.627668	-0.440824	0.165332	0.28061
Average																								-0.363012	0.146826
SW002-2	2019-07-18	1.13463	1.41315	2.80199	1.42416	2.68717	-7.41767e-06	1.04273	1.25517	1.24547	4.47976e-06	2.46951	1.81397e-06	0.959022		-1.8432	0.92679	-2.04248	0.923379		-1.86949	0.485089	0.730252	-1.77831	0.176924	0.306471
SW002-3	2019-07-18	1.11655	1.39066	2.758	1.40145	2.64492	-5.25209e-06	1.04275	1.25516	1.2455	4.61923e-06	2.47012	1.86966e-06	0.958999		-1.84542	0.92673	-2.04215	0.923357		-2.47069	0.467881	0.677297	-2.04245	0.181747	0.280411
Average																								-1.91038	0.37355
SW003-1	2019-07-18	1.09658	1.36576	2.74026	1.37631	2.62768	-3.77462e-06	1.04284	1.25509	1.24546	4.44269e-06	2.4989	1.77799e-06	0.958918		-1.84266	0.926697	-2.04011	0.923331		-2.89316	0.442506	0.661728	-2.4094	0.178569	0.302456
SW003-2	2019-07-18	1.09802	1.36754	2.74279	1.37815	2.63016	-1.06356e-05	1.04282	1.25513	1.24547	4.25839e-06	2.49796	1.70415e-06	0.958935		-1.84281	0.926713	-2.0414	0.923318		-2.6777	0.391268	0.671193	-2.51219	0.142924	0.286395
SW003-3	2019-07-18	1.09201	1.36003	2.7282	1.37055	2.61614	-1.12403e-05	1.04284	1.25507	1.24543	3.16648e-06	2.49833	1.26752e-06	0.958924		-1.84004	0.92675	-2.0397	0.923325		-2.19154	0.401514	0.6328	-2.28165	0.211528	0.296026
Average																								-2.40108	0.230987
SW004-1	2019-07-18	1.13018	1.4076	2.7591	1.41848	2.64591	-9.66081e-06	1.04278	1.25508	1.24546	2.49156e-06	2.44129	1.0204e-06	0.958974		-1.84219	0.926777	-2.04007	0.92338		-2.25588	0.397365	0.597357	-1.75271	0.205829	0.283802
SW004-2	2019-07-18	1.12244	1.39792	2.7396	1.40876	2.62724	-8.90712e-06	1.04277	1.25508	1.24542	3.63616e-06	2.44076	1.49012e-06	0.958986		-1.83933	0.926841	-2.03995	0.92339		-1.61519	0.365009	0.559866	-1.65361	0.143279	0.237883
SW004-3	2019-07-18	1.12273	1.39825	2.73997	1.40906	2.62756	-8.04686e-06	1.04278	1.25502	1.2454	3.67336e-06	2.44045	1.50494e-06	0.958976		-1.83767	0.926834	-2.0384	0.923398		-1.2781	0.428499	0.65523	-1.52031	0.215269	0.312398
SW004-3	2019-10-04	1.12273	1.39825	2.73997	1.40906	2.62756	-8.04686e-06	1.04278	1.25502	1.2454	3.67336e-06	2.44045	1.50494e-06	0.958976		-1.83767	0.926834	-2.0384	0.923398		-1.2781	0.428499	0.65523	-1.52031	0.215269	0.312398
Average																								-1.61174	0.226117
Fosterville Gold
DC01-a-1	2019-12-12	2.7948	3.47861	3.48884	3.50201	3.34451	1.11643e-05	1.04315	1.25304	1.24467	4.84648e-06	1.24834	3.88215e-06	0.958633		-1.77526	0.927583	-1.98238	0.924036		4.45666	0.361936	0.491829	4.53961	0.139419	0.209773
DC01-a-2	2019-12-12	2.81324	3.50129	3.51238	3.52445	3.36665	1.50693e-05	1.04329	1.25281	1.24458	5.97623e-06	1.24852	4.78676e-06	0.958509		-1.76755	0.927601	-1.9757	0.92403		4.80934	0.266814	0.431529	4.46266	0.120395	0.206997
Average																								4.50114	0.108826
HS01-a-1	2019-12-12	2.8464	3.54257	3.54539	3.56602	3.39879	1.35387e-05	1.04313	1.25282	1.24458	5.50144e-06	1.24558	4.41664e-06	0.95865		-1.76754	0.92774	-1.97598	0.924157		6.31453	0.28648	0.42471	5.75687	0.162265	0.24015
HS01-a-2	2019-12-12	2.84768	3.54436	3.55012	3.5681	3.40351	1.54728e-05	1.04307	1.25298	1.24465	6.54858e-06	1.24667	5.25278e-06	0.958705		-1.77326	0.927695	-1.98063	0.924137		5.64432	0.274812	0.399004	5.57507	0.172038	0.24772
Average																								5.66597	0.257105
HS01-b-1	2019-12-12	2.41782	3.0093	3.11787	3.0295	2.98911	1.12511e-05	1.04307	1.25299	1.24463	5.75066e-06	1.28954	4.45963e-06	0.958704		-1.77228	0.927697	-1.98078	0.924127		5.90519	0.366802	0.487153	5.47582	0.176058	0.249951
HS01-b-2	2019-12-12	2.41106	3.00091	3.11051	3.021	2.98198	1.96022e-05	1.0431	1.25297	1.24464	8.30573e-06	1.2901	6.4383e-06	0.958679		-1.77307	0.927664	-1.98036	0.924106		5.54786	0.32678	0.461826	5.33829	0.17342	0.248477
Average																								5.40706	0.194494
HS05-a-1	2019-12-12	2.26733	2.8221	2.86092	2.84121	2.74251	1.52005e-05	1.04317	1.25311	1.24468	7.88865e-06	1.2618	6.25159e-06	0.958614		-1.77591	0.927544	-1.98419	0.923985		3.94221	0.412401	0.54055	3.83607	0.181089	0.253399
HS05-a-2	2019-12-12	2.30428	2.86801	2.90826	2.8872	2.78768	1.38335e-05	1.04325	1.25297	1.24464	7.00588e-06	1.26211	5.55115e-06	0.95854		-1.77318	0.927542	-1.98031	0.923985		4.09518	0.340323	0.513103	3.98579	0.185202	0.242496
Average																								3.91093	0.211738
HS10-a-1	2019-12-12	2.58208	3.2137	3.25979	3.23498	3.12512	1.62814e-05	1.04309	1.25286	1.24462	6.99224e-06	1.26248	5.53859e-06	0.958689		-1.77099	0.927719	-1.97718	0.924174		5.98591	0.284429	0.429195	5.96451	0.157862	0.227426
HS10-a-2	2019-12-12	2.57278	3.20206	3.24993	3.22333	3.11568	1.54356e-05	1.04309	1.25286	1.24459	6.55593e-06	1.2632	5.18992e-06	0.958691		-1.7688	0.927761	-1.97713	0.924177		6.19106	0.279788	0.45642	5.84316	0.135557	0.228527
Average																								5.90384	0.171615
CEZAg (Gold standard)
CEZAG-1-1	2019-10-04	2.55514	3.18077	3.57435	3.20315	3.42608	1.5302e-05	1.04328	1.25361	1.24485	6.57056e-06	1.39888	4.69742e-06	0.95852		-1.79055	0.927223	-1.99833	0.923652		0.426273	0.332514	0.494059	0.390595	0.170644	0.25082
CEZAG-1-2	2019-10-04	2.56607	3.19433	3.59016	3.21683	3.44125	2.16401e-05	1.04327	1.2536	1.24483	8.55279e-06	1.39909	6.11294e-06	0.958522		-1.78914	0.927244	-1.99821	0.923653		0.482017	0.344635	0.502088	0.426376	0.141131	0.222804
CEZAG-1-3	2019-10-04	2.54834	3.17222	3.56353	3.19444	3.41561	2.43628e-05	1.04331	1.25354	1.24482	9.5799e-06	1.39837	6.85113e-06	0.95849		-1.78768	0.927238	-1.99629	0.923661		0.361481	0.348716	0.510971	0.510568	0.174129	0.265964
CEZAg-1-4	2019-10-09	2.16608	2.69635	2.91877	2.71498	2.79739	0.000115981	1.04339	1.25341	1.24481	5.3546e-05	1.34749	3.97375e-05	0.958413		-1.78687	0.92717	-1.99268	0.923646		-0.162918	0.321087	0.474823	0.315232	0.194056	0.264373
CEZAg-1-5	2019-10-09	2.14006	2.66367	2.88038	2.68168	2.76012	0.000117147	1.04357	1.25309	1.24467	5.47418e-05	1.34593	4.06718e-05	0.95825		-1.77564	0.927213	-1.98362	0.923648		0.128048	0.348573	0.509552	0.263402	0.145155	0.24028
CEZAg-1-6	2019-10-09	2.14317	2.66744	2.88509	2.68539	2.76454	0.000119408	1.04361	1.253	1.24462	5.57086e-05	1.34618	4.13826e-05	0.958217		-1.77135	0.927247	-1.98108	0.923653		0.362125	0.43434	0.607569	0.2353	0.166549	0.274297
Average																								0.356912	0.209458
CEZAG-2-1	2019-10-04	2.66025	3.31163	3.59651	3.33497	3.44733	1.94314e-05	1.04327	1.25363	1.24486	7.66205e-06	1.35194	5.66721e-06	0.958522		-1.79124	0.927214	-1.99896	0.923644		0.213023	0.296164	0.465265	0.272653	0.168035	0.243526
CEZAG-2-2	2019-10-04	2.64845	3.29694	3.58087	3.32023	3.43243	2.68405e-05	1.04325	1.25365	1.24486	1.03228e-05	1.35206	7.63469e-06	0.958545		-1.79131	0.927221	-1.99954	0.923652		0.324643	0.314953	0.445397	0.369569	0.169911	0.233507
CEZAG-2-3	2019-10-04	2.63155	3.27585	3.55885	3.29891	3.41122	2.04738e-05	1.04328	1.2536	1.24484	8.22084e-06	1.35238	6.07863e-06	0.958519		-1.7894	0.927239	-1.99806	0.923653		0.232455	0.311283	0.445777	0.296029	0.183381	0.248917
CEZAg-2-5	2019-10-09	2.13175	2.65334	3.01103	2.67131	2.88544	2.55841e-05	1.04353	1.2531	1.24468	1.20957e-05	1.41247	8.56328e-06	0.958288		-1.776	0.927234	-1.98405	0.923676		0.334914	0.344919	0.510895	0.525663	0.158016	0.253387
CEZAg-2-6	2019-10-09	2.1294	2.65041	3.00642	2.66839	2.881	2.00977e-05	1.04353	1.25312	1.24468	1.0048e-05	1.41186	7.11685e-06	0.958282		-1.77581	0.92725	-1.98453	0.923656		0.626883	0.427148	0.595476	0.374002	0.25554	0.335911
Average																								0.367583	0.197904
CEZAG-3-1	2019-10-04	2.49221	3.10249	3.48333	3.12436	3.33892	2.42721e-05	1.04325	1.25365	1.24487	1.00125e-05	1.39768	7.16384e-06	0.958542		-1.79274	0.927201	-1.99946	0.923658		-0.0089757	0.319634	0.477114	0.327333	0.171174	0.234918
CEZAG-3-2	2019-10-04	2.48625	3.09507	3.4747	3.11689	3.33063	2.21422e-05	1.04326	1.25365	1.24487	9.31602e-06	1.39757	6.66585e-06	0.958537		-1.79268	0.927188	-1.99951	0.92365		-0.115596	0.369849	0.491864	0.227018	0.131031	0.210509
CEZAG-3-3	2019-10-04	2.46181	3.06457	3.44039	3.08614	3.2977	2.3933e-05	1.04327	1.25361	1.24485	1.00927e-05	1.39751	7.22198e-06	0.958526		-1.7904	0.927228	-1.99836	0.923663		0.155093	0.361297	0.481491	0.284208	0.151456	0.239959
CEZAg-3-4	2019-10-09	2.12631	2.6466	2.78835	2.66455	2.67205	2.01201e-05	1.04353	1.25313	1.24469	9.65967e-06	1.31136	7.36739e-06	0.95829		-1.7771	0.927217	-1.98484	0.923661		0.200797	0.367147	0.545971	0.429183	0.160602	0.25235
CEZAg-3-5	2019-10-09	2.1301	2.65135	2.79582	2.6695	2.67936	1.86478e-05	1.04347	1.25322	1.24471	9.06774e-06	1.31253	6.90872e-06	0.958344		-1.77835	0.927244	-1.98746	0.923668		0.371102	0.320511	0.465703	0.387296	0.166195	0.254759
CEZAg-3-6	2019-10-09	2.12841	2.64922	2.79127	2.66724	2.67491	2.46443e-05	1.0435	1.25316	1.24469	1.1665e-05	1.31143	8.89395e-06	0.958313		-1.77731	0.92725	-1.98575	0.923668		0.453654	0.335755	0.48317	0.450574	0.188427	0.287537
Average																								0.350935	0.173753
CEZAG-4	2019-12-12	2.93234	3.64967	3.90591	3.67419	3.74265	1.55356e-05	1.04362	1.25299	1.24463	6.07148e-06	1.33202	4.55813e-06	0.9582		-1.77169	0.927237	-1.98086	0.923644		0.913579	0.281092	0.4366	0.314027	0.137609	0.204486
CEZAG-5	2019-12-12	2.93442	3.6524	3.91084	3.67708	3.74762	1.54204e-05	1.04355	1.25308	1.24467	5.96227e-06	1.33275	4.47355e-06	0.958265		-1.77571	0.927222	-1.9835	0.923661		0.55022	0.265469	0.415542	0.449277	0.144039	0.205527
CEZAG-6	2019-12-12	2.92563	3.64132	3.899	3.66572	3.73602	1.44514e-05	1.04362	1.25297	1.24463	5.53418e-06	1.33271	4.15214e-06	0.958201		-1.77189	0.927229	-1.98023	0.923655		0.462453	0.336931	0.476895	0.257032	0.157797	0.221419
Grand Mean																								0.349294	0.126958
Cumulative Mean																								0.355267	0.179368
Sigma 5 (Au-Ag Mixture)
ICP5-1-1	2019-10-09	2.06408	2.56918	2.96776	2.58671	2.84434	3.65386e-05	1.04339	1.2532	1.24471	1.77138e-05	1.43781	1.23201e-05	0.958415		-1.77874	0.927327	-1.98688	0.923747		1.21922	0.35201	0.501557	1.22129	0.227472	0.310022
ICP5-1-2	2019-10-09	2.05893	2.56277	2.95985	2.58029	2.83681	4.10602e-05	1.04337	1.25322	1.24471	1.99415e-05	1.43757	1.38717e-05	0.95843		-1.77867	0.927318	-1.98731	0.923759		1.25296	0.439124	0.575	1.35401	0.162609	0.249457
ICP5-1-3	2019-10-09	2.04445	2.5447	2.93871	2.5621	2.81647	3.88084e-05	1.04341	1.25319	1.24468	1.89784e-05	1.43741	1.32031e-05	0.9584		-1.77658	0.927344	-1.98661	0.923741		1.39572	0.35316	0.518331	1.19317	0.156127	0.249024
Average																								1.25616	0.171809
ICP5-2-1	2019-10-09	2.07661	2.58476	2.92065	2.60243	2.79918	9.47466e-05	1.04339	1.25321	1.2447	4.56242e-05	1.40645	3.24393e-05	0.95841		-1.77802	0.927327	-1.98711	0.923736		1.24899	0.413207	0.603155	1.21529	0.168151	0.261844
ICP5-2-2	2019-10-09	2.08064	2.5898	2.92586	2.6075	2.80427	8.97446e-05	1.04336	1.25322	1.24471	4.31282e-05	1.40623	3.06695e-05	0.958443		-1.77896	0.927326	-1.98735	0.923762		1.38074	0.315817	0.518207	1.43377	0.154745	0.257306
ICP5-2-3	2019-10-09	2.07582	2.58375	2.91945	2.60142	2.79802	9.30735e-05	1.0434	1.2532	1.24469	4.48367e-05	1.40641	3.18799e-05	0.958407		-1.77664	0.927339	-1.98675	0.923735		1.57311	0.334306	0.489122	1.1638	0.186866	0.263622
Average																								1.27095	0.28666
ICP5-3-1	2019-10-09	2.05681	2.56013	2.62019	2.57764	2.51119	4.19908e-05	1.0434	1.25322	1.2447	2.04644e-05	1.2739	1.6065e-05	0.958403		-1.77824	0.927308	-1.98738	0.92373		1.32397	0.405361	0.566572	1.23684	0.230115	0.295004
ICP5-3-3	2019-10-09	2.04068	2.54004	2.60006	2.5574	2.4919	3.49849e-05	1.0434	1.25321	1.2447	1.71392e-05	1.27411	1.3452e-05	0.958403		-1.77811	0.927315	-1.98712	0.923734		1.0875	0.330433	0.496033	1.08529	0.158409	0.250566
Average																								1.16106	0.214321
Sigma 10 (Au-Ag Mixture)
ICP10-1-1	2019-10-09	2.04148	2.54107	2.94733	2.55846	2.82478	4.76687e-05	1.04338	1.25323	1.24472	2.33485e-05	1.44372	1.61723e-05	0.95842		-1.77944	0.927312	-1.98773	0.923737		1.05117	0.444835	0.586447	1.0946	0.173419	0.268771
ICP10-1-2	2019-10-09	1.99837	2.48745	2.88714	2.50459	2.76717	5.23083e-05	1.04335	1.25332	1.24474	2.61719e-05	1.44475	1.8115e-05	0.958448		-1.78153	0.927311	-1.99011	0.923724		1.12878	0.310808	0.479198	1.05126	0.168089	0.269025
ICP10-1-3	2019-10-09	2.0212	2.51584	2.91895	2.53303	2.79757	4.98836e-05	1.04339	1.25323	1.24472	2.46979e-05	1.44416	1.71019e-05	0.958418		-1.77987	0.927287	-1.98768	0.923727		0.739416	0.353677	0.505424	1.03721	0.156692	0.257176
Average																								1.06102	0.0598265
ICP10-3-1	2019-10-09	2.01016	2.50213	2.6153	2.51925	2.5066	3.99502e-05	1.04337	1.25326	1.24474	1.9872e-05	1.30103	1.52748e-05	0.958436		-1.78107	0.927301	-1.9884	0.923742		0.714335	0.418309	0.557842	1.14636	0.177964	0.28209
ICP10-3-2	2019-10-09	2.00659	2.4977	2.6111	2.51486	2.50263	3.64301e-05	1.04334	1.2533	1.24475	1.82465e-05	1.30127	1.40238e-05	0.958459		-1.78239	0.927285	-1.98964	0.923746		0.790347	0.386167	0.555288	1.325	0.209079	0.3137
ICP10-3-3	2019-10-09	2.00307	2.49335	2.60607	2.51044	2.49776	3.48126e-05	1.04336	1.2533	1.24477	1.73783e-05	1.30104	1.33575e-05	0.95844		-1.78367	0.927265	-1.98955	0.923729		0.793944	0.371786	0.544794	1.14588	0.162478	0.267954
Average																								1.20575	0.206547
Sigma MON (In-house Ag standard)
ICP001	2019-02-04	1.47827	1.83903	3.84782	1.84951	3.68392	4.15845e-06	1.04449	1.25113	1.24404	6.08654e-06	2.60292	2.33841e-06	0.957403		-1.72194	0.92735	-1.92819	0.923802		1.38686	0.35504	0.578814	1.4801	0.195708	0.296528
ICP001(OLD)	2019-02-04	1.43893	1.79037	3.58665	1.80112	3.43493	1.02796e-05	1.04417	1.25171	1.24424	9.56461e-06	2.49258	3.83695e-06	0.957699		-1.7389	0.927344	-1.94459	0.923801		1.18093	0.426334	0.50276	1.35054	0.185707	0.221547
ICP002	2019-02-04	1.45008	1.80401	3.77884	1.81444	3.61811	4.26507e-06	1.04442	1.25127	1.24408	6.08201e-06	2.60596	2.33396e-06	0.957466		-1.72537	0.927326	-1.93214	0.923784		0.92444	0.380544	0.620802	1.15737	0.167274	0.270181
ICP003	2019-02-04	1.4265	1.77474	3.72014	1.78507	3.5622	5.92998e-06	1.04434	1.25137	1.24413	7.61103e-06	2.60789	2.91842e-06	0.957543		-1.72924	0.927348	-1.93492	0.923813		1.23132	0.468614	0.673969	1.52455	0.21343	0.305871
ICP004	2019-02-04	1.38971	1.729	3.62943	1.73916	3.47546	9.41799e-06	1.0443	1.25146	1.24415	8.70434e-06	2.61165	3.33286e-06	0.957578		-1.73082	0.927363	-1.93738	0.923809		1.60292	0.423111	0.636225	1.57468	0.191086	0.293435
ICP001	2019-04-10	1.88737	2.34715	4.91133	2.35894	4.69864	8.96863e-06	1.04527	1.24985	1.24361	6.96291e-06	2.6022	2.67559e-06	0.956694		-1.68527	0.927292	-1.89186	0.923737		1.32324	0.415102	0.554698	1.31355	0.157602	0.252902
ICP002	2019-04-10	1.8932	2.35428	4.91358	2.36573	4.70017	1.73111e-05	1.0454	1.24959	1.24354	9.74399e-06	2.59538	3.75419e-06	0.956568		-1.67966	0.927265	-1.88448	0.923742		1.03753	0.402217	0.589122	1.3177	0.179791	0.274471
ICP003	2019-04-10	1.92376	2.39254	4.99381	2.40485	4.77817	1.47157e-05	1.04513	1.25008	1.24368	8.47284e-06	2.59587	3.26454e-06	0.956817		-1.69104	0.927295	-1.8983	0.923742		1.15317	0.30197	0.552575	1.22251	0.174758	0.27441
ICP001	2019-04-11	1.513	1.88137	3.88034	1.89041	3.71139	1.7241e-05	1.04552	1.24945	1.24347	1.24131e-05	2.56467	4.84014e-06	0.95646		-1.67355	0.927242	-1.88037	0.9237		0.809134	0.402104	0.62365	1.22994	0.187266	0.290834
ICP002	2019-04-11	1.48445	1.84568	3.81093	1.85426	3.64435	8.11166e-06	1.04571	1.24912	1.24334	8.11743e-06	2.56722	3.16189e-06	0.956286		-1.66242	0.927268	-1.87113	0.923692		1.02678	0.457858	0.642045	1.13295	0.197013	0.297714
ICP003(OLD)	2019-04-11	1.4793	1.83904	3.81478	1.84725	3.64731	1.26112e-05	1.04592	1.24873	1.24318	1.16015e-05	2.57876	4.49878e-06	0.956099		-1.64902	0.927323	-1.85996	0.923701		1.65935	0.351338	0.54695	1.28785	0.19856	0.294257
ICP004(OLD)	2019-04-11	1.43356	1.78231	3.69896	1.7904	3.53687	7.05932e-06	1.04583	1.24892	1.24328	7.61586e-06	2.58025	2.95209e-06	0.956179		-1.65706	0.927266	-1.86546	0.923689		1.22334	0.46061	0.632905	1.25295	0.180028	0.283125
ICP003	2019-05-08	1.8372	2.28392	5.30647	2.29388	5.0732	0.000371062	1.04598	1.24857	1.24315	0.000201962	2.88834	6.9923e-05	0.956039		-1.64659	0.927294	-1.85547	0.92372		1.03099	0.413363	0.61212	1.28722	0.141724	0.250966
ICP005	2019-05-08	1.89312	2.35128	5.46337	2.35737	5.21391	0.000374875	1.04784	1.24523	1.24201	0.000198017	2.8859	6.86158e-05	0.95434		-1.54961	0.927328	-1.76031	0.923709		1.26561	0.282139	0.496119	1.15569	0.171225	0.256322
ICP006	2019-05-08	1.89013	2.34748	5.44869	2.35322	5.19931	0.000372417	1.04797	1.245	1.24197	0.000197036	2.88268	6.83519e-05	0.95423		-1.54569	0.927295	-1.75389	0.923716		1.16477	0.436498	0.599912	1.29396	0.165042	0.252068
ICP007	2019-05-08	1.85951	2.30935	5.39781	2.31484	5.15036	0.000370493	1.04805	1.24486	1.24191	0.000199271	2.90282	6.86474e-05	0.954157		-1.54119	0.927295	-1.75	0.923709		1.10178	0.381021	0.541243	1.18477	0.210988	0.280505
ICP008	2019-05-08	1.85843	2.30801	5.39526	2.31353	5.14797	0.00037259	1.04804	1.24488	1.24191	0.000200507	2.90304	6.90684e-05	0.954164		-1.5411	0.927288	-1.75053	0.923703		0.932489	0.441262	0.593533	1.13207	0.175143	0.251899
ICP009	2019-05-08	1.83502	2.27896	5.29837	2.28445	5.05561	0.000362756	1.04802	1.24491	1.24193	0.000197642	2.88726	6.84524e-05	0.954181		-1.54237	0.927293	-1.75138	0.923708		1.18634	0.414965	0.579499	1.28117	0.189629	0.261803
ICP010	2019-05-08	1.81454	2.25351	5.24594	2.25894	5.00551	0.000362543	1.04803	1.24491	1.24192	0.000199793	2.89104	6.91073e-05	0.954167		-1.54162	0.927296	-1.75121	0.923697		1.26952	0.492585	0.656682	1.11531	0.20332	0.273187
ICP001	2019-06-20	1.77287	2.20514	4.35791	2.21726	4.171	-6.64954e-07	1.04481	1.25066	1.24383	4.05108e-06	2.45811	1.64797e-06	0.957111		-1.70396	0.927328	-1.91491	0.923733		2.25322	0.477915	0.637333	1.5548	0.174846	0.265906
ICP002	2019-06-20	1.75369	2.1812	4.30917	2.19302	4.124	4.22853e-06	1.0449	1.25052	1.24378	5.70088e-06	2.4572	2.31994e-06	0.957029		-1.69964	0.92732	-1.91081	0.923726		2.11023	0.373131	0.568969	1.53076	0.18154	0.26651
ICP003	2019-06-20	1.76959	2.20109	4.34932	2.21309	4.16262	6.15568e-06	1.04485	1.25062	1.24384	6.04928e-06	2.45781	2.46122e-06	0.957074		-1.70512	0.927266	-1.91377	0.923716		1.39102	0.366328	0.587248	1.35602	0.156751	0.254682
ICP001	2019-07-08	1.49344	1.85626	3.59479	1.86389	3.43587	1.31105e-05	1.04626	1.24804	1.24294	1.01038e-05	2.40699	4.19812e-06	0.955788		-1.62855	0.927344	-1.84049	0.923732		2.20219	0.467215	0.69432	1.48928	0.216124	0.301214
ICP002	2019-07-08	1.48576	1.84687	3.58375	1.85471	3.42588	1.15495e-05	1.04608	1.24833	1.24305	8.87918e-06	2.41206	3.68086e-06	0.955949		-1.63809	0.927327	-1.84863	0.923745		1.69692	0.368224	0.644929	1.63471	0.166967	0.261455
ICP003	2019-07-08	1.50478	1.87053	3.63079	1.87846	3.47082	1.05251e-05	1.04609	1.24833	1.24306	1.00019e-05	2.41283	4.14532e-06	0.955941		-1.63835	0.927317	-1.84861	0.923739		1.66068	0.54525	0.742821	1.62692	0.198794	0.277803
ICP001	2019-10-09	1.93543	2.40911	2.62096	2.42575	2.51212	1.79499e-05	1.04333	1.25334	1.24475	1.04366e-05	1.3542	7.70729e-06	0.958473		-1.78186	0.927316	-1.99078	0.92374		1.48666	0.35252	0.51417	1.36501	0.203938	0.288396
ICP002	2019-10-09	1.91623	2.38518	2.5964	2.40156	2.48849	2.37469e-05	1.04336	1.25328	1.24473	1.28034e-05	1.35495	9.45178e-06	0.958441		-1.78017	0.927313	-1.98893	0.923737		1.31838	0.454197	0.621469	1.35223	0.222939	0.308579
ICP003	2019-10-09	1.92754	2.39925	2.60948	2.41573	2.50109	2.31727e-05	1.04334	1.25327	1.24473	1.28343e-05	1.35379	9.48011e-06	0.958463		-1.78005	0.927329	-1.98887	0.92376		1.3391	0.347617	0.525364	1.48571	0.163088	0.27287
ICP001	2019-12-10	1.21855	1.51749	3.26005	1.52945	3.12763	2.15739e-05	1.04234	1.25514	1.24533	1.85488e-05	2.67537	6.93299e-06	0.959381		-1.83138	0.927322	-2.04171	0.923748		0.6544	0.426952	0.687869	1.08689	0.203646	0.316866
ICP002	2019-12-10	1.17994	1.46907	3.14012	1.48003	3.01123	1.42524e-05	1.0428	1.25432	1.24504	1.2743e-05	2.66126	4.78555e-06	0.958954		-1.80654	0.927337	-2.01854	0.923733		1.45364	0.55469	0.740703	1.13819	0.228382	0.317746
ICP003	2019-12-10	1.43809	1.79028	3.82511	1.80308	3.66714	1.92055e-05	1.04308	1.25381	1.2449	1.44265e-05	2.65986	5.42399e-06	0.958703		-1.79488	0.927301	-2.00392	0.92374		1.1586	0.445128	0.663909	1.34154	0.192644	0.301241
ICP001	2019-12-12	2.92656	3.64261	4.04639	3.66712	3.87773	1.7557e-05	1.04349	1.25305	1.24467	6.45958e-06	1.38265	4.67203e-06	0.958319		-1.77567	0.927278	-1.98252	0.923732		1.30917	0.257147	0.390236	1.25695	0.111691	0.185812
ICP002	2019-12-12	2.92828	3.64469	4.04811	3.66899	3.87917	1.8371e-05	1.04355	1.25295	1.24465	6.7439e-06	1.38242	4.87852e-06	0.958266		-1.77388	0.927271	-1.97973	0.923725		1.29272	0.346626	0.489755	1.24002	0.157758	0.227704
ICP003	2019-12-12	2.93048	3.6474	4.05318	3.67175	3.88402	2.25091e-05	1.04355	1.25295	1.24464	7.94806e-06	1.38312	5.74648e-06	0.958264		-1.77318	0.927268	-1.97979	0.923728		1.3759	0.280817	0.461719	1.23581	0.128048	0.205776
Average																								1.32323	0.311769
